# Supplementary material
Source: PubMed Central journal article supplement (PMC4425986)
Supplement: NIHMS677492-supplement-2.pdf [file NIHMS677492-supplement-2.pdf]

**A. Toronto Test Score (against gravity):**

|                        |       |
|------------------------|-------|
| Elbow flexion (0-2)    | _____ |
| Elbow extension (0-2)  | _____ |
| Wrist extension (0-2)  | _____ |
| Finger extension (0-2) | _____ |
| Thumb extension (0-2)  | _____ |
| <b>Total score</b>     | _____ |

|                             |     |                                        |
|-----------------------------|-----|----------------------------------------|
| 0 No joint movement         | 0   | Total score < 3.5 ⇒ Early microsurgery |
| 0+ Flicker of movement→     | 0.3 |                                        |
| 1- Less than half range→    | 0.6 |                                        |
| 1 Half range of movement→   | 1.0 |                                        |
| 1+ Greater than half range→ | 1.3 |                                        |
| 2- Good but not full range→ | 1.6 |                                        |
| 2 Full range motion →       | 2.0 |                                        |

Michelow BJ, Clarke HM, Curtis CG, Zuker RM, Seifu Y, Andrews DF. The natural history of obstetrical brachial plexus palsy. *Plast Reconstr Surg.* 1994;93:675-81.
