# Supplementary material
Source: PubMed Central journal article supplement (PMC4425986)
Supplement: NIHMS677492-supplement-4.pdf [file NIHMS677492-supplement-4.pdf]

**B. Active Movement Scale (AMS)**

Observation

|                            |       |                              |              |
|----------------------------|-------|------------------------------|--------------|
| Shoulder abduction         | _____ |                              |              |
| Shoulder adduction         | _____ | <u>Gravity Minimized</u>     | <u>Score</u> |
| Shoulder flexion           | _____ | No contraction               | 0            |
| Shoulder external rotation | _____ | Contraction, no motion       | 1            |
| Shoulder internal rotation | _____ | <b>Motion ≤ 1/2 range</b>    | 2            |
| Elbow flexion              | _____ | <b>Motion &gt; 1/2 range</b> | 3            |
| Elbow extension            | _____ | Full motion                  | 4            |
| Forearm pronation          | _____ | <u>Against Gravity</u>       |              |
| Forearm supination         | _____ | <b>Motion ≤ 1/2 range</b>    | 5            |
| Wrist flexion              | _____ | <b>Motion &gt; 1/2 range</b> | 6            |
| Wrist extension            | _____ | Full motion                  | 7            |
| Finger flexion             | _____ |                              |              |
| Finger extension           | _____ |                              |              |
| Thumb flexion              | _____ |                              |              |
| Thumb extension            | _____ |                              |              |

A score of 4 must be achieved before a higher score can be assigned. Scores are assigned based on the available passive range of motion. Clarke HM, Curtis CG. An approach to obstetrical brachial plexus injuries. *Hand Clinics*. 1995;11:563-580. The AMS was not designed to provide a total score. However, the total score has been used in clinical decision-making algorithms and to demonstrate change.<sup>51,107-108</sup>
