# Supplementary material
Source: PubMed Central journal article supplement (PMC4425986)
Supplement: NIHMS677492-supplement-6.pdf [file NIHMS677492-supplement-6.pdf]

C.

**Modified Mallet classification (Grade I = no function, Grade V = normal function)**

|                          | Not Testable | Grade I     | Grade II                                                                                                  | Grade III                                                                                                            | Grade IV                                                                                                                   | Grade V |
|--------------------------|--------------|-------------|-----------------------------------------------------------------------------------------------------------|----------------------------------------------------------------------------------------------------------------------|----------------------------------------------------------------------------------------------------------------------------|---------|
| Global Abduction         | Not Testable | No function | <br><30°                 | <br>30° to 90°                      | <br>>90°                                | Normal  |
| Global External Rotation | Not Testable | No function | <br><0°                  | <br>0° to 20°                      | <br>>20°                                | Normal  |
| Hand to neck             | Not Testable | No function | <br>Not possible         | <br>Difficult                      | <br>Easy                                | Normal  |
| Hand to spine            | Not Testable | No function | <br>Not possible         | <br>S1                             | <br>T12                                 | Normal  |
| Hand to mouth            | Not Testable | No function | <br>Marked trumpet sign | <br>Partial trumpet sign          | <br><40° of abduction                  | Normal  |
| Internal rotation        | Not Testable | No function | <br>Cannot Touch       | <br>Can touch with wrist flexion | <br>Palm on belly<br>No wrist flexion | Normal  |

1. Mallet J. Primaute du traitement de l'épaule -- methode d'expression des resultats. *Rev Chir Orthop.* 1972;58S:166-8. 2. Abzug JM, Kozin SH. Evaluation and management of brachial plexus birth palsy. *Orthop Clin N Am.* 2014;45:225-32.
