# Supplementary material
Source: PubMed Central journal article supplement (PMC4425986)
Supplement: NIHMS677492-supplement-8.pdf [file NIHMS677492-supplement-8.pdf]

## D. Brachial Plexus Outcome Measure

|                                                                                                               |
|---------------------------------------------------------------------------------------------------------------|
| <b>Activity Scale</b>                                                                                         |
| <b>SHOULDER</b>                                                                                               |
| Hand to back of head<br><i>- Combs back of head</i>                                                           |
| Forward Overhead Reaching<br><i>- Uses two hands to place a container directly</i>                            |
| Midline Activity<br><i>- Undo button or snap at navel level</i>                                               |
| Hand to back pant pocket<br><i>- Puts affected fingers into ipsilateral back pant pocket</i>                  |
| <b>ELBOW AND FOREARM</b>                                                                                      |
| Hand to mouth<br><i>- Holds plate with unaffected hand, picks up cookie from plate and places it in mouth</i> |
| Uses computer mouse<br><i>- Uses affected hand with individual finger isolation on mouse</i>                  |
| Playing drums<br><i>- Hits drum sticks on table</i>                                                           |
| Holds plate with palm up<br><i>- Holds plate with affected hand palm up</i>                                   |
| <b>WRIST, FINGERS AND THUMB</b>                                                                               |
| Opening large container                                                                                       |

### Functional

#### Movement Scale:

1. Cannot complete task
2. Completes task using only unaffected arm
3. Completes task. Absent active movement in primary mover(s). May use PROM to complete movement pattern.
4. Completes task. Initiates all movement actively or position of primary mover(s) is sufficient for function. Compensatory techniques used to complete movement pattern.
5. Completes task with normal movement pattern.

### Self-Evaluation Scale

#### My arm works.....

 \_\_\_\_\_   
 Very Poorly                      Very Well

#### My hand works.....

 \_\_\_\_\_   
 Very Poorly                      Very Well

#### My arm and hand looks.....

 \_\_\_\_\_   
 Very Bad                      Very Good

- *Opens 5" diameter container with snap on lid*

Pulls apart medium resistance theraputty

- *Uses power grasp to pull apart theraputty with active wrist extension*

Strings bead

- *Holds either bead or string with precision grip with affected hand*

Ho ES, Curtis CG, Clarke HM. The Brachial Plexus Outcome Measure: development, internal consistency, and construct validity. *J Hand Ther.* 2012;25(4):406-17.
